# Supplementary material for: GIGANTEA recruits the UBP12 and UBP13 deubiquitylases to regulate accumulation of the ZTL photoreceptor complex
Source: PubMed Central journal article supplement (PMC6704089; doi:10.1038/s41467-019-11769-7), 2019-08-21
Supplement: 41467_2019_11769_MOESM3_ESM.pdf [file 41467_2019_11769_MOESM3_ESM.pdf]

## **Description of Additional Supplementary Files**

File Name: Supplementary Data 1

Description: The list of proteins identified by immunoprecipitation followed by mass spectrometry using 35S::FLAG-His-ZTL decoy in the Col-0 or gi-2 background.
